# Supplementary material
Source: publisher figshare collection journal article supplement (https://rs.figshare.com/ndownloader/files/28860744)
Supplement: Supplementary file 1 [file 28860744]

## Sheet: metadata
Datafile S5. Summary data for 17 kingdom-level clades based on described species richness.
Kingdom-level clades are listed alphabetically
Data include the estimated percentage of species that are multicellular in each clade, and the estimated percentage having sexual reproduction.
Ages are in millions of years before present.
Richness is the estimated number of described species
Diversification rates were estimated using an epsilon of 0, 0.5, 0.9.

## Sheet: Datafile S5
Kingdom	Multicellular (%)	Sexual (%)	Age	Age (ln)	Richness	Richness (ln)	Div. rate (e=0)	Div. rate (e=0.5)	Div. rate (e=0.9)	Taxon name in tree
Amoebozoa	17.5	85.12	1773.27	7.48058	803	6.6884	0.00163806	0.0014686	0.00107686	Mastigamoebabalamuthi
Animal	100	100	959.599	6.86652	1525728	14.238	0.00644381	0.0061301	0.00540171	Hypsibiusd
Archaea	0	0	3806	8.24433	377	5.9322	0.00067692	0.00059812	0.00041686	Hyperthermus.butylicus.DSM5456
Charophyta	38.34	99.48	738.547	6.60469	4867	8.4902	0.00499257	0.00458509	0.00363965	Mesostigmaviride
Chlorophyta	40.13	56.15	936.304	6.84194	6847	8.8316	0.00409644	0.003775	0.00302902	Dunaliellasalina
Choanozoa	0	0.72	1295.71	7.16682	139	4.9345	0.00165393	0.00142401	0.00090318	Monosigabrevicollis
Cryptophyta	0	0	1102.82	7.00562	170	5.1358	0.0020225	0.00175184	0.00113604	Guillardiatheta
Eubacteria	9.18	0	4200	8.34284	9982	9.2085	0.00095219	0.00088053	0.00071419	Listeriaceae
Excavata	0	9	1698.42	7.43746	1655	7.4116	0.00189517	0.00171809	0.00130778	Diplonemapapillatum
Filasterea	0	0	942.175	6.84819	3	1.0986	0.00050641	0.00031951	8.404e-05	Capsasporaowczarzaki
Fungi	97.33	66.57	1295.71	7.16682	135577	11.8173	0.00396091	0.00372858	0.00318915	basGeastrumpectinatum
Glaucophyta	0	0	1550.12	7.34609	18	2.8904	0.00080979	0.00063074	0.00027828	Cyanophoraparadoxa
Haptophytes	0	32.61	1546.01	7.34343	109	4.6913	0.00131786	0.00112571	0.00069332	Emilianiahuxleyi
Katablepharidophyta	0	0	1102.82	7.00562	10	2.3026	0.00090677	0.00067134	0.00025276	Leucocryptosmarina
Plant	100	86.9	433.078	6.07092	345502	12.7528	0.0127885	0.0120934	0.0104795	Zamiaceae200
Rhodophyta	99.56	90.82	1486.48	7.30416	7321	8.8985	0.00259981	0.00239734	0.00192744	Porphyrayezoensis
SAR	7.92	89.13	1546.01	7.34343	29030	10.2761	0.00288669	0.00269198	0.00223995	Crypthecodiniumcohnii
